# Supplementary material for: Pathogenic Vibrio Species Are Associated with Distinct Environmental Niches and Planktonic Taxa in Southern California (USA) Aquatic Microbiomes
Source: PubMed Central journal article supplement (PMC8407410; doi:10.1128/msystems.00571-21), 2021-07-06
Supplement: msystems.00571-21-sf001.pdf [file msystems.00571-21-sf001.pdf]

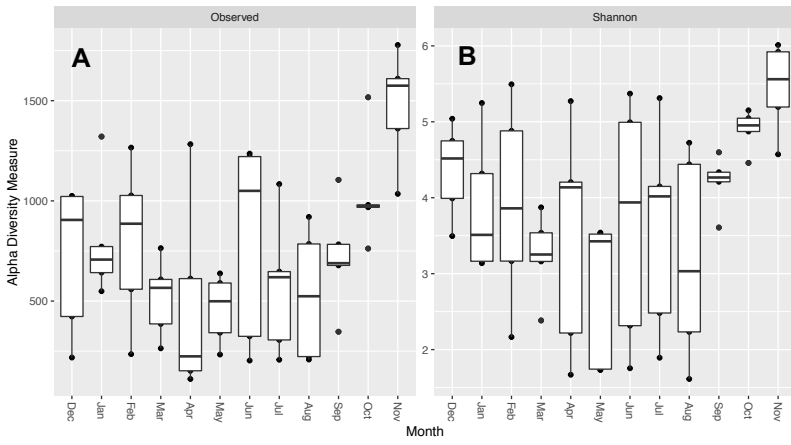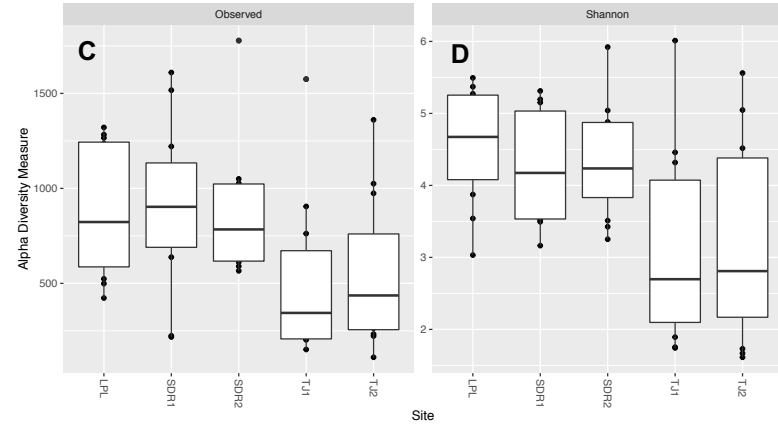

**E**

|                   | Statistic<br>(Kruskal-Wallis chi-squared) | <i>p-value</i> |
|-------------------|-------------------------------------------|----------------|
| Observed by Site  | 13.04                                     | 0.011          |
| Observed by Month | 22.25                                     | 0.023          |
| Shannon by Site   | 13.35                                     | 0.010          |
| Shannon by Month  | 22.80                                     | 0.019          |
