# Supplementary material for: Pathogenic Vibrio Species Are Associated with Distinct Environmental Niches and Planktonic Taxa in Southern California (USA) Aquatic Microbiomes
Source: PubMed Central journal article supplement (PMC8407410; doi:10.1128/msystems.00571-21), 2021-07-06
Supplement: msystems.00571-21-sf002.pdf [file msystems.00571-21-sf002.pdf]

### A. Random forest classification

| <b>16S amplicon data</b> |                       |                              |                             |
|--------------------------|-----------------------|------------------------------|-----------------------------|
| <b>Variable</b>          | <b>Accuracy ratio</b> | <b>Baseline accuracy (%)</b> | <b>Overall accuracy (%)</b> |
| Month ( <i>n</i> =12)    | 11                    | 8.33                         | 91.67                       |
| Site ( <i>n</i> =5)      | 4                     | 20.83                        | 83.33                       |
| <b>18S amplicon data</b> |                       |                              |                             |
| Month ( <i>n</i> =12)    | 6                     | 8.33                         | 50.00                       |
| Site ( <i>n</i> =5)      | 2.4                   | 20.83                        | 50.00                       |

### B. Random forest regression

+

| <b>16S amplicon data</b> |                |                |                 |                                 |                  |
|--------------------------|----------------|----------------|-----------------|---------------------------------|------------------|
| <b>Variable</b>          | <b>R-value</b> | <b>p-value</b> | <b>R-square</b> | <b>Mean squared error (MSE)</b> | <b>Std Error</b> |
| Temperature              | 0.90           | 1.54e-09       | 0.82            | 7.53                            | 0.061            |
| Salinity                 | 0.85           | 1.61e-07       | 0.72            | 23.85                           | 0.088            |
| <b>18S amplicon data</b> |                |                |                 |                                 |                  |
| Temperature              | 0.47           | 0.019          | 0.22            | 25.55                           | 0.085            |
| Salinity                 | 0.44           | 0.032          | 0.19            | 75.63                           | 0.068            |
