# Supplementary material for: Pathogenic Vibrio Species Are Associated with Distinct Environmental Niches and Planktonic Taxa in Southern California (USA) Aquatic Microbiomes
Source: PubMed Central journal article supplement (PMC8407410; doi:10.1128/msystems.00571-21), 2021-07-06
Supplement: msystems.00571-21-sf003.pdf [file msystems.00571-21-sf003.pdf]

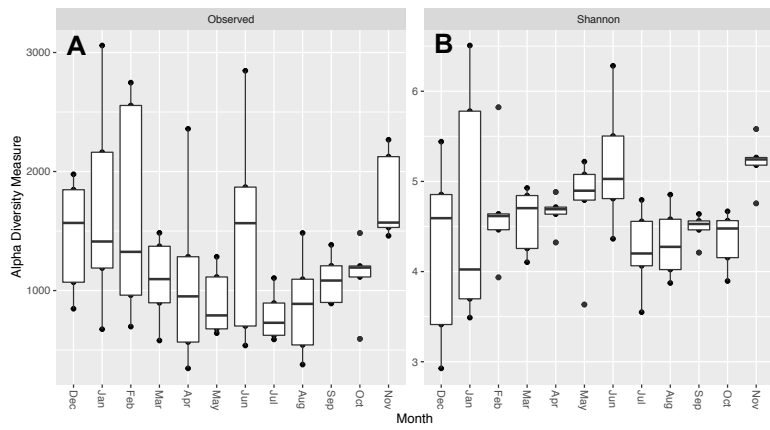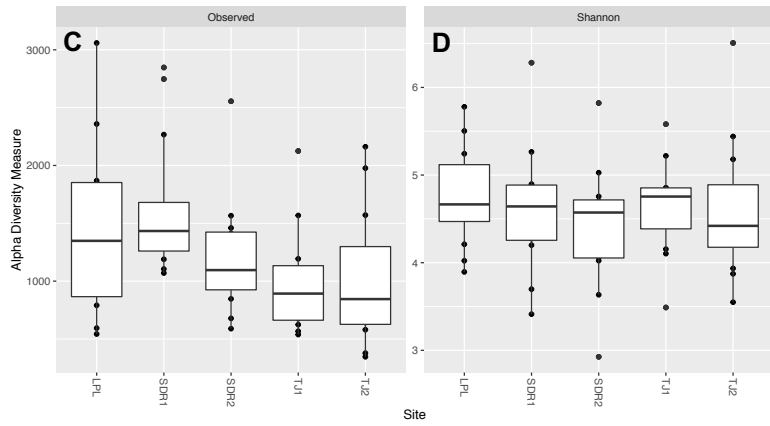

**E**

|                   | Statistic<br>(Kruskal-Wallis chi-squared) | <i>p-value</i> |
|-------------------|-------------------------------------------|----------------|
| Observed by Site  | 9.65                                      | 0.047          |
| Observed by Month | 17.14                                     | 0.104          |
| Shannon by Site   | 1.73                                      | 0.785          |
| Shannon by Month  | 16.58                                     | 0.121          |
