# Supplementary material for: Pathogenic Vibrio Species Are Associated with Distinct Environmental Niches and Planktonic Taxa in Southern California (USA) Aquatic Microbiomes
Source: PubMed Central journal article supplement (PMC8407410; doi:10.1128/msystems.00571-21), 2021-07-06

16S Community Dissimilarity (Bray Curtis) 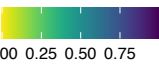 0.00 0.25 0.50 0.75

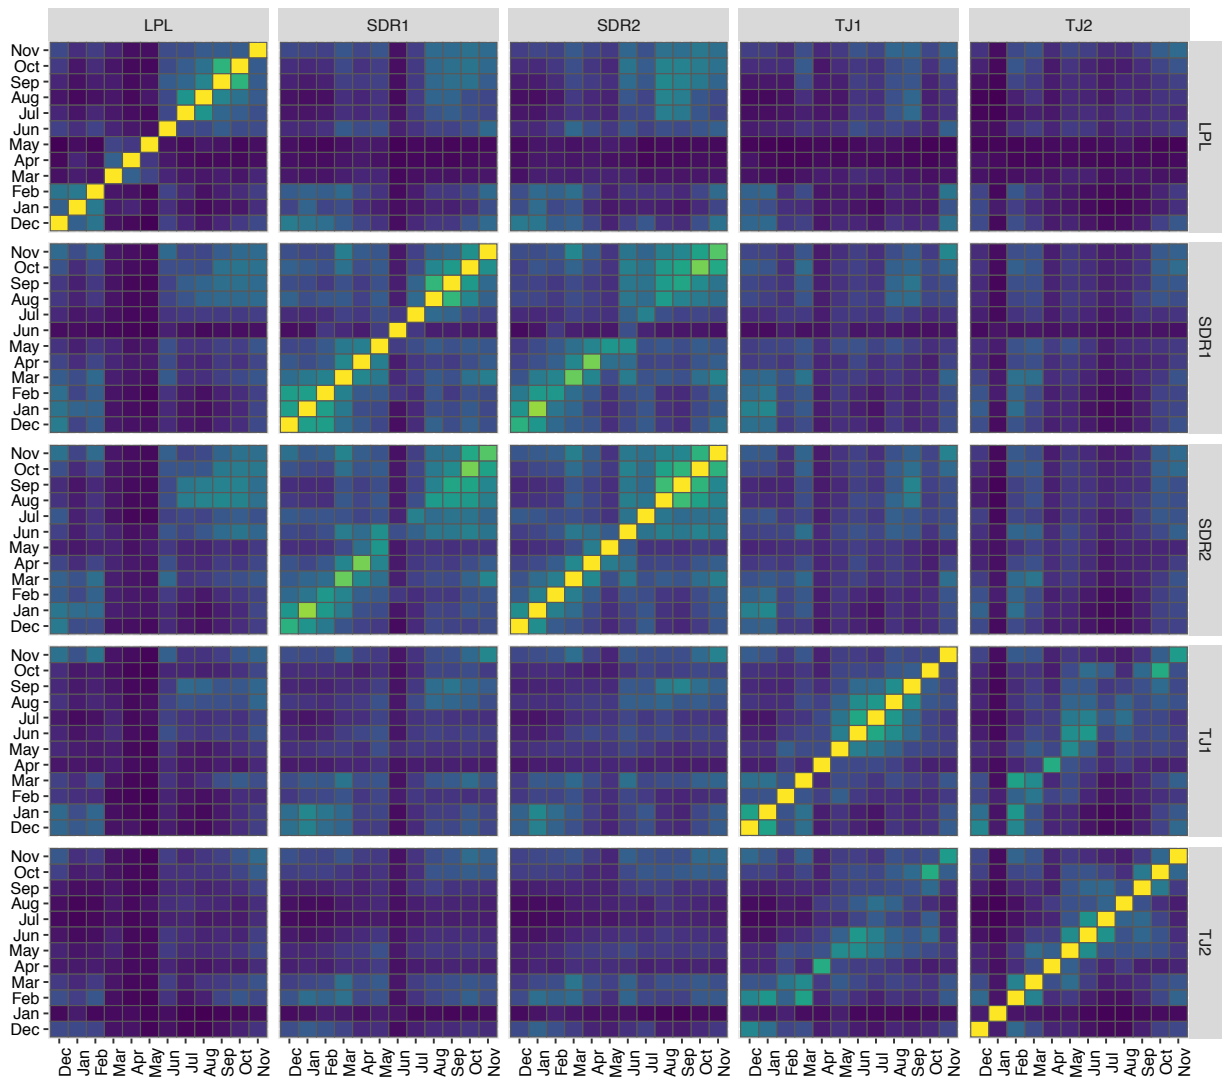

Supplement: msystems.00571-21-sf006.pdf [file msystems.00571-21-sf006.pdf]
