# Supplementary material for: Pathogenic Vibrio Species Are Associated with Distinct Environmental Niches and Planktonic Taxa in Southern California (USA) Aquatic Microbiomes
Source: PubMed Central journal article supplement (PMC8407410; doi:10.1128/msystems.00571-21), 2021-07-06

**A**

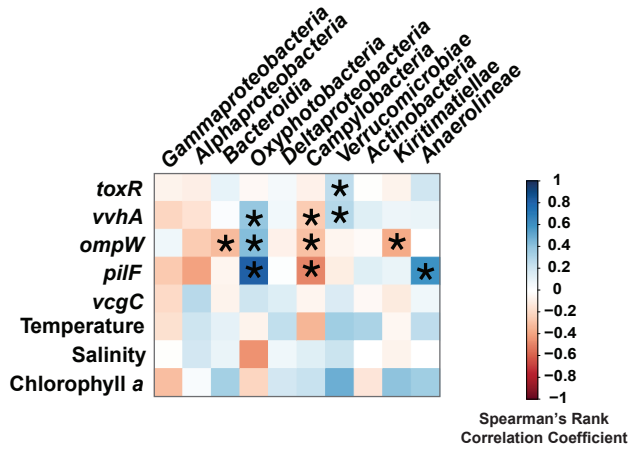

**B**

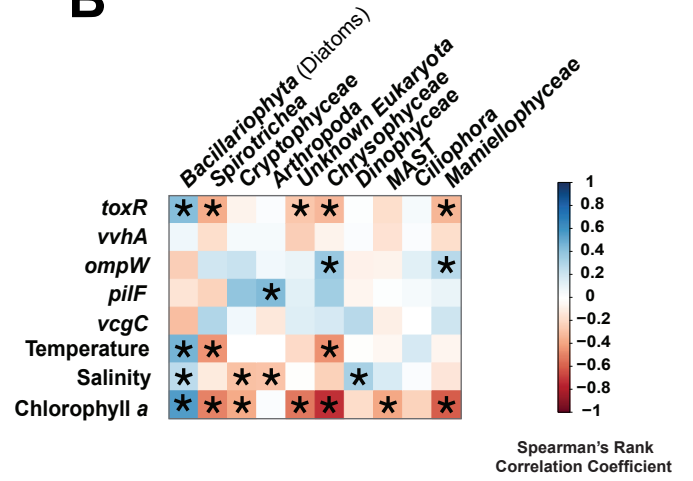

Supplement: msystems.00571-21-sf008.pdf [file msystems.00571-21-sf008.pdf]
