# Supplementary material for: Pathogenic Vibrio Species Are Associated with Distinct Environmental Niches and Planktonic Taxa in Southern California (USA) Aquatic Microbiomes
Source: PubMed Central journal article supplement (PMC8407410; doi:10.1128/msystems.00571-21), 2021-07-06
Supplement: msystems.00571-21-st001.pdf [file msystems.00571-21-st001.pdf]

| Target Species             | Target Gene | Primer Name | Sequence                                                     | Ta (°C) | Study                      |
|----------------------------|-------------|-------------|--------------------------------------------------------------|---------|----------------------------|
| <i>V. vulnificus</i>       | <i>vcgC</i> | VVC-FW      | AAAACCTCATTGARCAGTAACGAAA                                    | 60      | Baker-Austin et al. 2010   |
| <i>V. vulnificus</i>       | <i>vcgC</i> | VVC-REV     | AGCTGGATCTAAKCCCAATGC                                        | 60      | Baker-Austin et al. 2010   |
| <i>V. vulnificus</i>       | <i>vcgC</i> | VVC-Probe   | /5HEX/AATTAAAGC/ZEN/CGTCAAGCC<br>ACTTGACTGTAA/3IABkFQ/       | 60      | Baker-Austin et al. 2010   |
| <i>V. vulnificus</i>       | <i>pilF</i> | PILF-FW     | GATTGACTACGAYCCACACCG                                        | 60      | Baker-Austin et al. 2012   |
| <i>V. vulnificus</i>       | <i>pilF</i> | PILF-REV    | GRCGCGCTTGGGTGTAG                                            | 60      | Baker-Austin et al. 2012   |
| <i>V. vulnificus</i>       | <i>pilF</i> | PILF-PROBE  | /56-<br>FAM/TGCTCAACC/ZEN/TCGCTAAGTT<br>GGAAATCGATA/3IABkFQ/ | 60      | Baker-Austin et al. 2012   |
| <i>V. parahaemolyticus</i> | <i>toxR</i> | TOXR-FW     | GAACCAGAAGCGCCAGTAGT                                         | 58      | Taiwo et al. 2017          |
| <i>V. parahaemolyticus</i> | <i>toxR</i> | TOXR-REV    | AAACAAGCAGTACGCAAATCG                                        | 58      | Taiwo et al. 2017          |
| <i>V. parahaemolyticus</i> | <i>toxR</i> | TOXR-Probe  | /5HEX/TCACAGCAG/ZEN/AAGCCACAG<br>GTGC/3IABkFQ/               | 58      | Taiwo et al. 2017          |
| <i>V. vulnificus</i>       | <i>vvhA</i> | VVHA-FW     | TGTTTATGGTGAGAACGGTGACA                                      | 58      | Campbell and Wright 2003   |
| <i>V. vulnificus</i>       | <i>vvhA</i> | VVHA- REV   | TTCTTTATCTAGGCCCAAACCTG                                      | 58      | Campbell and Wright 2003   |
| <i>V. vulnificus</i>       | <i>vvhA</i> | VVHA-Probe  | /56-<br>FAM/CCGTAAACC/ZEN/GAACCACCCG<br>CAA/3IABkFQ/         | 58      | Campbell and Wright 2003   |
| <i>V. cholerae</i>         | <i>ompW</i> | ompW-F      | TCAATGATAGCTGGTTCCTCAAC                                      | 58      | Garrido-Maestu et al. 2014 |
| <i>V. cholerae</i>         | <i>ompW</i> | ompW-R      | CGATGATAAATACCCAAGGATTGA                                     | 58      | Garrido-Maestu et al. 2014 |
| <i>V. cholerae</i>         | <i>ompW</i> | ompW-Probe  | /5HEX/TGGTATGCC/ZEN/AATATTGAA<br>ACAACG/3IABkFQ/             | 58      | Garrido-Maestu et al. 2014 |
