# Supplementary material for: Pathogenic Vibrio Species Are Associated with Distinct Environmental Niches and Planktonic Taxa in Southern California (USA) Aquatic Microbiomes
Source: PubMed Central journal article supplement (PMC8407410; doi:10.1128/msystems.00571-21), 2021-07-06
Supplement: msystems.00571-21-st002.pdf [file msystems.00571-21-st002.pdf]

| Site | Month     | <i>toxR</i> copies/<br>100 mL:<br><i>V. parahaemolyticus</i><br>species | <i>vvhA</i> copies/<br>100 mL:<br><i>V. vulnificus</i><br>species | <i>ompW</i> copies/<br>100 mL:<br><i>V. cholerae</i><br>species | <i>pilF</i> copies/<br>100 mL:<br><i>V. vulnificus</i><br>virulence | <i>vcgC</i> copies/<br>100mL:<br><i>V. vulnificus</i><br>virulence | High abundance<br>of one or more<br>species (>1000<br>copies/ mL) | Isolate<br>Shotgun<br>Sequencing |
|------|-----------|-------------------------------------------------------------------------|-------------------------------------------------------------------|-----------------------------------------------------------------|---------------------------------------------------------------------|--------------------------------------------------------------------|-------------------------------------------------------------------|----------------------------------|
| LPL  | December  | 0                                                                       | 0                                                                 | 12                                                              | NA                                                                  | NA                                                                 |                                                                   |                                  |
| LPL  | January   | 0                                                                       | 0                                                                 | 16                                                              | NA                                                                  | NA                                                                 |                                                                   |                                  |
| LPL  | February  | 0                                                                       | 0                                                                 | 0                                                               | NA                                                                  | NA                                                                 |                                                                   | Yes                              |
| LPL  | March     | 476                                                                     | 0                                                                 | 31824                                                           | NA                                                                  | NA                                                                 | Yes                                                               | Yes                              |
| LPL  | April     | 756                                                                     | 560                                                               | 1151                                                            | 1162                                                                | 0                                                                  | Yes                                                               |                                  |
| LPL  | May       | 788                                                                     | 1649                                                              | 288864                                                          | 74                                                                  | 168                                                                | Yes                                                               | Yes                              |
| LPL  | June      | 1253                                                                    | 105                                                               | 19                                                              | 112                                                                 | 49                                                                 | Yes                                                               |                                  |
| LPL  | July      | 53                                                                      | 0                                                                 | 0                                                               | NA                                                                  | NA                                                                 |                                                                   | Yes                              |
| LPL  | August    | 133                                                                     | 42                                                                | 8                                                               | 0                                                                   | 0                                                                  |                                                                   | Yes                              |
| LPL  | September | 152                                                                     | 16                                                                | 67                                                              | 0                                                                   | 0                                                                  |                                                                   |                                  |
| LPL  | October   | 179                                                                     | 0                                                                 | 0                                                               | NA                                                                  | NA                                                                 |                                                                   |                                  |
| LPL  | November  | 215                                                                     | 0                                                                 | 0                                                               | NA                                                                  | NA                                                                 |                                                                   |                                  |
| SDR1 | December  | 203                                                                     | 0                                                                 | NA                                                              | NA                                                                  | NA                                                                 |                                                                   |                                  |
| SDR1 | January   | 0                                                                       | 90                                                                | 0                                                               | 0                                                                   | 0                                                                  |                                                                   |                                  |
| SDR1 | February  | 0                                                                       | 0                                                                 | 0                                                               | NA                                                                  | NA                                                                 |                                                                   | Yes                              |
| SDR1 | March     | 641                                                                     | 0                                                                 | 29                                                              | NA                                                                  | NA                                                                 |                                                                   | Yes                              |
| SDR1 | April     | 1124                                                                    | 3675                                                              | NA                                                              | 1250                                                                | 210                                                                | Yes                                                               |                                  |
| SDR1 | May       | 3045                                                                    | 13020                                                             | 0                                                               | 7350                                                                | 0                                                                  | Yes                                                               | Yes                              |
| SDR1 | June      | 6510                                                                    | 1491                                                              | 0                                                               | 1155                                                                | 0                                                                  | Yes                                                               |                                  |
| SDR1 | July      | 2940                                                                    | 347                                                               | 29                                                              | 95                                                                  | 0                                                                  | Yes                                                               | Yes                              |
| SDR1 | August    | 399                                                                     | 0                                                                 | 0                                                               | NA                                                                  | NA                                                                 |                                                                   | Yes                              |
| SDR1 | September | 467                                                                     | 0                                                                 | 0                                                               | NA                                                                  | NA                                                                 |                                                                   |                                  |
| SDR1 | October   | 882                                                                     | 0                                                                 | 0                                                               | NA                                                                  | NA                                                                 |                                                                   |                                  |
| SDR1 | November  | 168                                                                     | 0                                                                 | 0                                                               | NA                                                                  | NA                                                                 |                                                                   |                                  |
| SDR2 | December  | 0                                                                       | 0                                                                 | 19                                                              | NA                                                                  | NA                                                                 |                                                                   |                                  |
| SDR2 | January   | 91                                                                      | 0                                                                 | 19                                                              | NA                                                                  | NA                                                                 |                                                                   |                                  |
| SDR2 | February  | 287                                                                     | 0                                                                 | 0                                                               | NA                                                                  | NA                                                                 |                                                                   | Yes                              |
| SDR2 | March     | 756                                                                     | 0                                                                 | 0                                                               | 0                                                                   | 868                                                                |                                                                   | Yes                              |
| SDR2 | April     | 882                                                                     | 3780                                                              | 29                                                              | 872                                                                 | 0                                                                  | Yes                                                               |                                  |
| SDR2 | May       | 1964                                                                    | 14175                                                             | 286                                                             | 7560                                                                | 0                                                                  | Yes                                                               | Yes                              |
| SDR2 | June      | 189                                                                     | 63                                                                | 0                                                               | 0                                                                   | 0                                                                  |                                                                   |                                  |
| SDR2 | July      | 959                                                                     | 0                                                                 | 19                                                              | NA                                                                  | NA                                                                 |                                                                   | Yes                              |
| SDR2 | August    | 0                                                                       | 47                                                                | 0                                                               | 0                                                                   | 0                                                                  |                                                                   | Yes                              |
| SDR2 | September | 53                                                                      | 0                                                                 | 0                                                               | NA                                                                  | NA                                                                 |                                                                   |                                  |
| SDR2 | October   | 205                                                                     | 0                                                                 | 0                                                               | NA                                                                  | NA                                                                 |                                                                   |                                  |
| SDR2 | November  | 142                                                                     | 0                                                                 | 0                                                               | NA                                                                  | NA                                                                 |                                                                   |                                  |
| TJ1  | December  | 32                                                                      | 0                                                                 | 50                                                              | NA                                                                  | NA                                                                 |                                                                   |                                  |
| TJ1  | January   | 0                                                                       | 0                                                                 | 0                                                               | NA                                                                  | NA                                                                 |                                                                   |                                  |
| TJ1  | February  | 1008                                                                    | 0                                                                 | 0                                                               | NA                                                                  | NA                                                                 | Yes                                                               | Yes                              |

|     |           |       |     |    |    |    |     |     |
|-----|-----------|-------|-----|----|----|----|-----|-----|
| TJ1 | March     | 195   | 180 | 0  | 0  | 0  |     | Yes |
| TJ1 | April     | 21630 | 126 | 0  | 0  | 0  | Yes |     |
| TJ1 | May       | 284   | 0   | 0  | 0  | 0  |     | Yes |
| TJ1 | June      | 1071  | 0   | 0  | NA | NA | Yes |     |
| TJ1 | July      | 420   | 0   | 0  | NA | NA |     |     |
| TJ1 | August    | 704   | 0   | 0  | NA | NA |     | Yes |
| TJ1 | September | 397   | 0   | 0  | NA | NA |     |     |
| TJ1 | October   | 63    | 0   | 0  | 0  | 0  |     |     |
| TJ1 | November  | 21    | 0   | 0  | NA | NA |     |     |
| TJ2 | December  | 32    | 0   | 0  | NA | NA |     |     |
| TJ2 | January   | 0     | 0   | 0  | NA | NA |     |     |
| TJ2 | February  | 105   | 0   | 0  | NA | NA |     | Yes |
| TJ2 | March     | 126   | 98  | 0  | 0  | 0  |     | Yes |
| TJ2 | April     | 15015 | 95  | 0  | 0  | 0  | Yes |     |
| TJ2 | May       | 6930  | 63  | 0  | 0  | 84 | Yes | Yes |
| TJ2 | June      | 3537  | 0   | 0  | NA | NA | Yes |     |
| TJ2 | July      | 1218  | 0   | 0  | NA | NA | Yes |     |
| TJ2 | August    | 788   | 0   | 0  | NA | NA |     | Yes |
| TJ2 | September | 33530 | 0   | 16 | 0  | 0  | Yes |     |
| TJ2 | October   | 6825  | 74  | 0  | NA | NA | Yes |     |
| TJ2 | November  | 0     | 0   | 0  | NA | NA |     |     |
